# Supplementary material for: The First Complete Chloroplast Genome Sequence of Mortiño (Vaccinium floribundum) and Comparative Analyses with Other Vaccinium Species
Source: MDPI journal article supplement (doi:10.3390/horticulturae9030302), 2023-02-23
Supplement: s1 [file s1]

**Supplementary Figures-** The first complete chloroplast genome sequence of mortiño (*Vaccinium floribundum*) and comparative analyses with other *Vaccinium* species

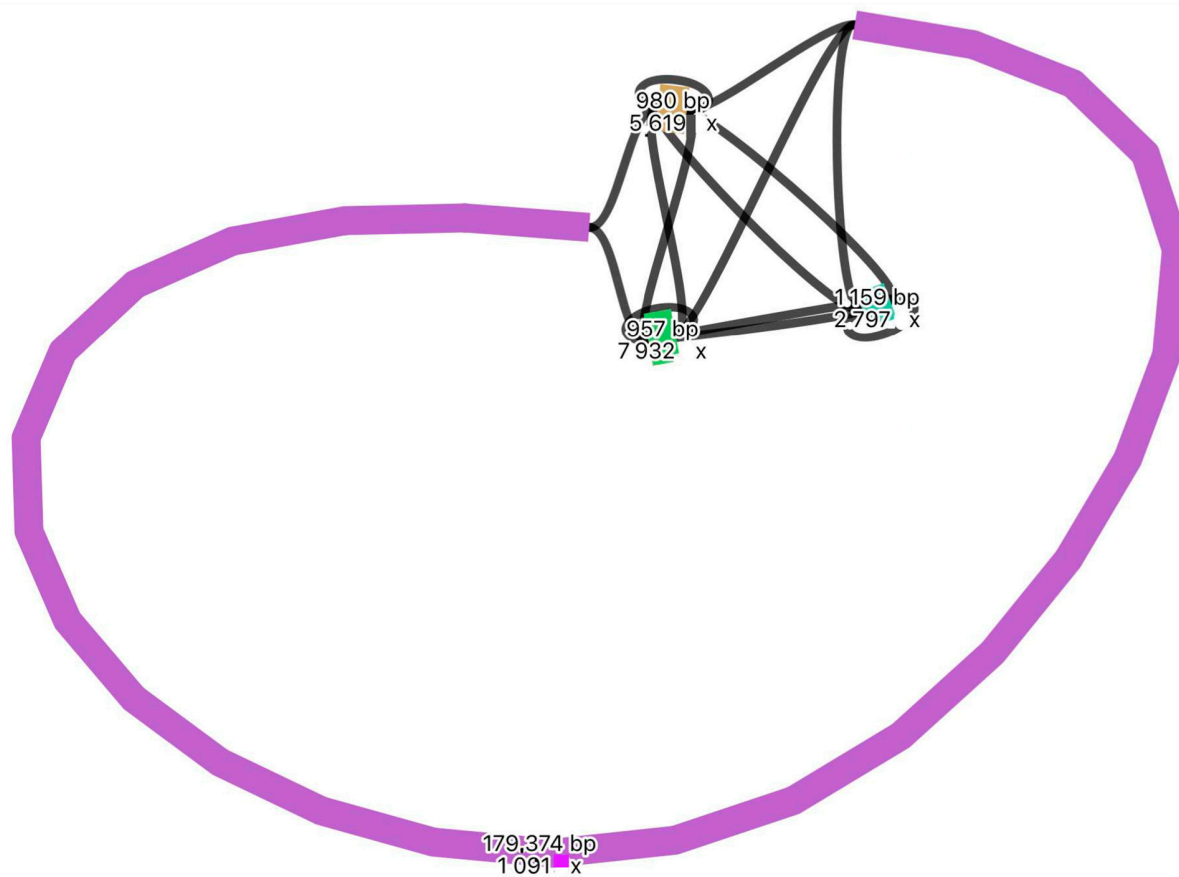

**Figure S1.** Bandage graph result from Flye genome assembly of *V. floribundum* cp genome. A quadripartite structure characteristic of cp genomes is not evident. There are a total of 4 fragments (1 that is composed of the majority of the genome size: 179,374 bp and three others with sizes: 957 bp, 980 bp and 1,159 bp). Numbers with x represent the coverage for each fragment.

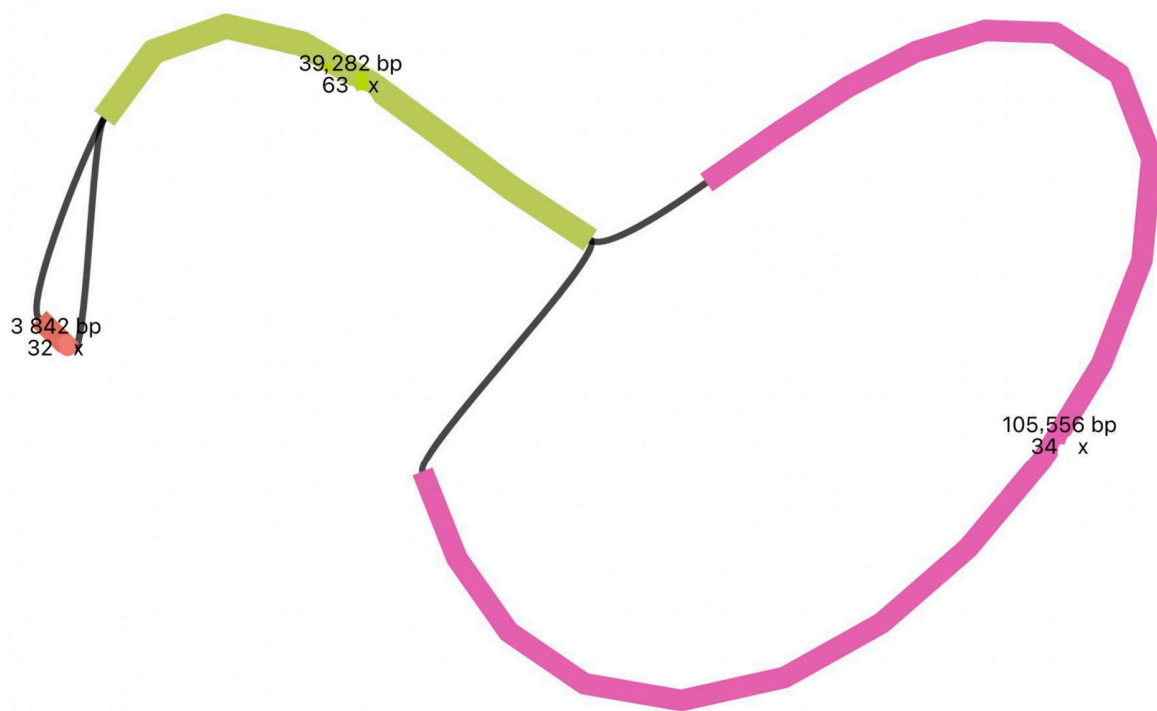

**Figure S2.** Bandage graph result from ptGAUL genome assembly of *V. floribundum* cp genome. A quadripartite structure characteristic of cp genomes is evident. There are a total of 3 fragments (1 similar to the size expected for the LSC region: 105,556 bp, 1 for the SSC region: 39,282 bp and 1 for the IR regions: 3,842 bp). Numbers with x represent the coverage for each fragment.

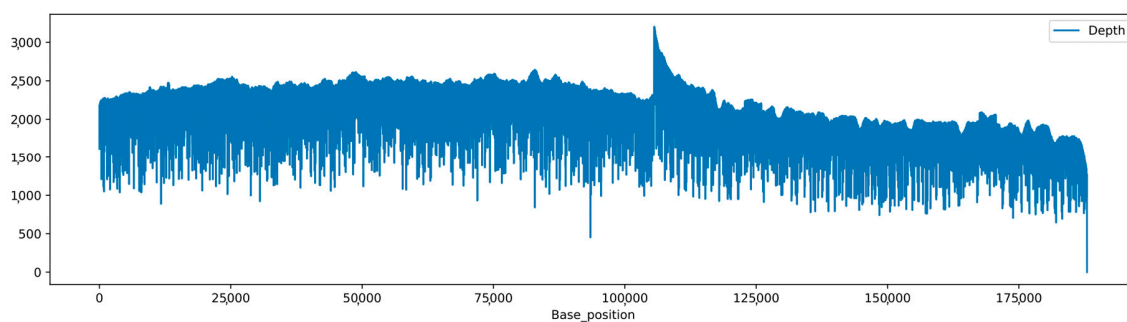

**Figure S3.** Depth coverage of *V. floribundum* cp genome by base position. The y-axis represents the depth of coverage, and the x-axis represents the base position in bp.

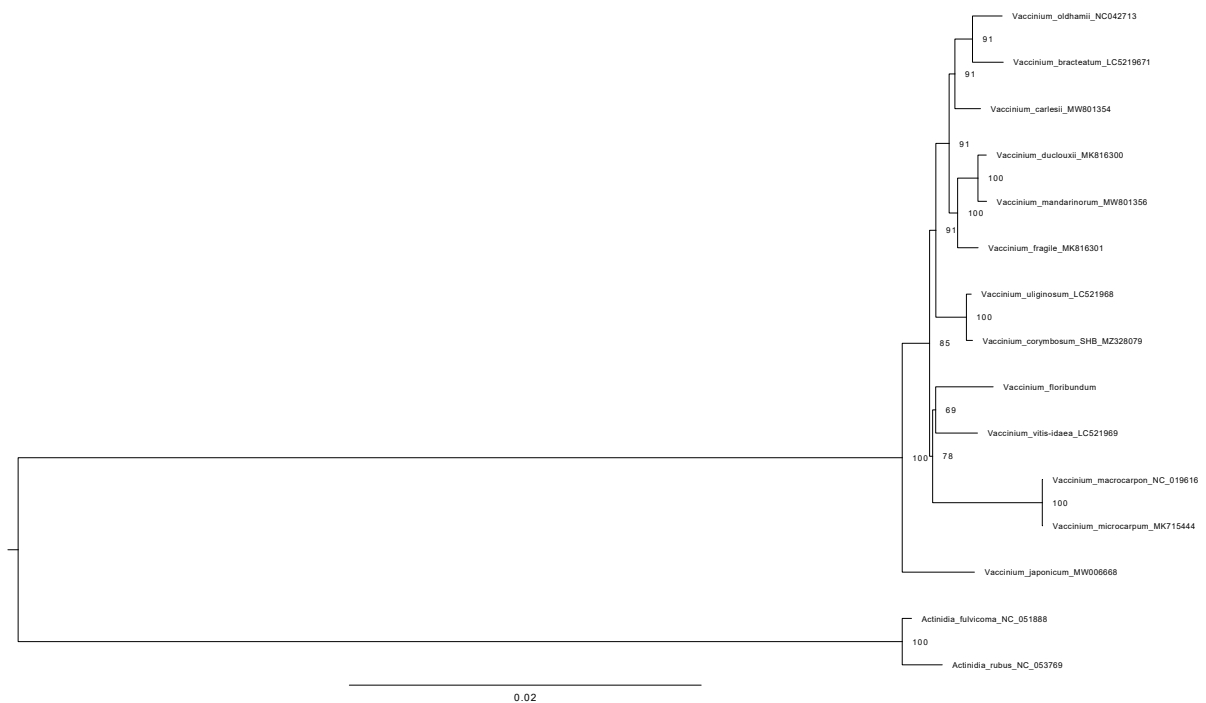

**Figure S4.** Preliminary phylogenetic tree constructed with 87 genes of 13 *Vaccinium* species cp genomes including *V. floribundum* cp genome using RAxML. Branch labels indicate the bootstrap support (BS) values (%). The scale bar represents nucleotide substitutions per site. Two sequences of *Actinidia* genus (*A. rubus* and *A. fulvicoma*) were used as an outgroup to root the tree.

## Supplementary Material

**Material S1-** In-house script to create the *V. floribundum* cp genome coverage graph.

```
import matplotlib.pyplot as plt
import pandas as pd
```

```
df = pd.read_csv('samtools_depth', sep='\t', names=["Sequence", "Base_position", "Depth"], index_col=0)
fig=df.plot(x='Base_position', y='Depth', kind='line', figsize=(16, 4)).get_figure()
fig.savefig("Coverage_plot.pdf")
plt.show()
```

**Material S2-** List of genes used to create the phylogenetic tree of *Vaccinium*.

---

accD  
atpA  
atpB  
atpE  
atpF  
atpH  
atpI  
ccsA  
cemA  
clpP  
matK  
ndhA  
ndhB  
ndhC  
ndhD  
ndhE  
ndhF  
ndhG  
ndhH  
ndhI  
ndhJ  
ndhK  
petA  
petB  
petD  
petG  
petL  
petN  
psaA  
psaB  
psaC  
psaI  
psaJ  
psbA

psbB  
psbC  
psbD  
psbE  
psbF  
psbG  
psbH  
psbI  
psbJ  
psbK  
psbL  
psbM  
psbN  
psbT  
psbZ  
rbcL  
rpl14  
rpl16  
rpl2  
rpl20  
rpl22  
rpl23  
rpl32  
rpl33  
rpl36  
rpoA  
rpoB  
rpoC1  
rpoC2  
rps11  
rps12  
rps14  
rps15  
rps16  
rps18  
rps19  
rps2  
rps3  
rps4  
rps7

rps8  
rrn16  
rrn23  
rrn4.5  
rrn5  
ycf1  
ycf10  
ycf15  
ycf2  
ycf3  
ycf4  
ycf68  
ycf9

---
