# Supplementary figures and images for: The First Complete Chloroplast Genome Sequence of Mortiño (Vaccinium floribundum) and Comparative Analyses with Other Vaccinium Species
Source: MDPI journal article supplement (doi:10.3390/horticulturae9030302), 2023-02-23

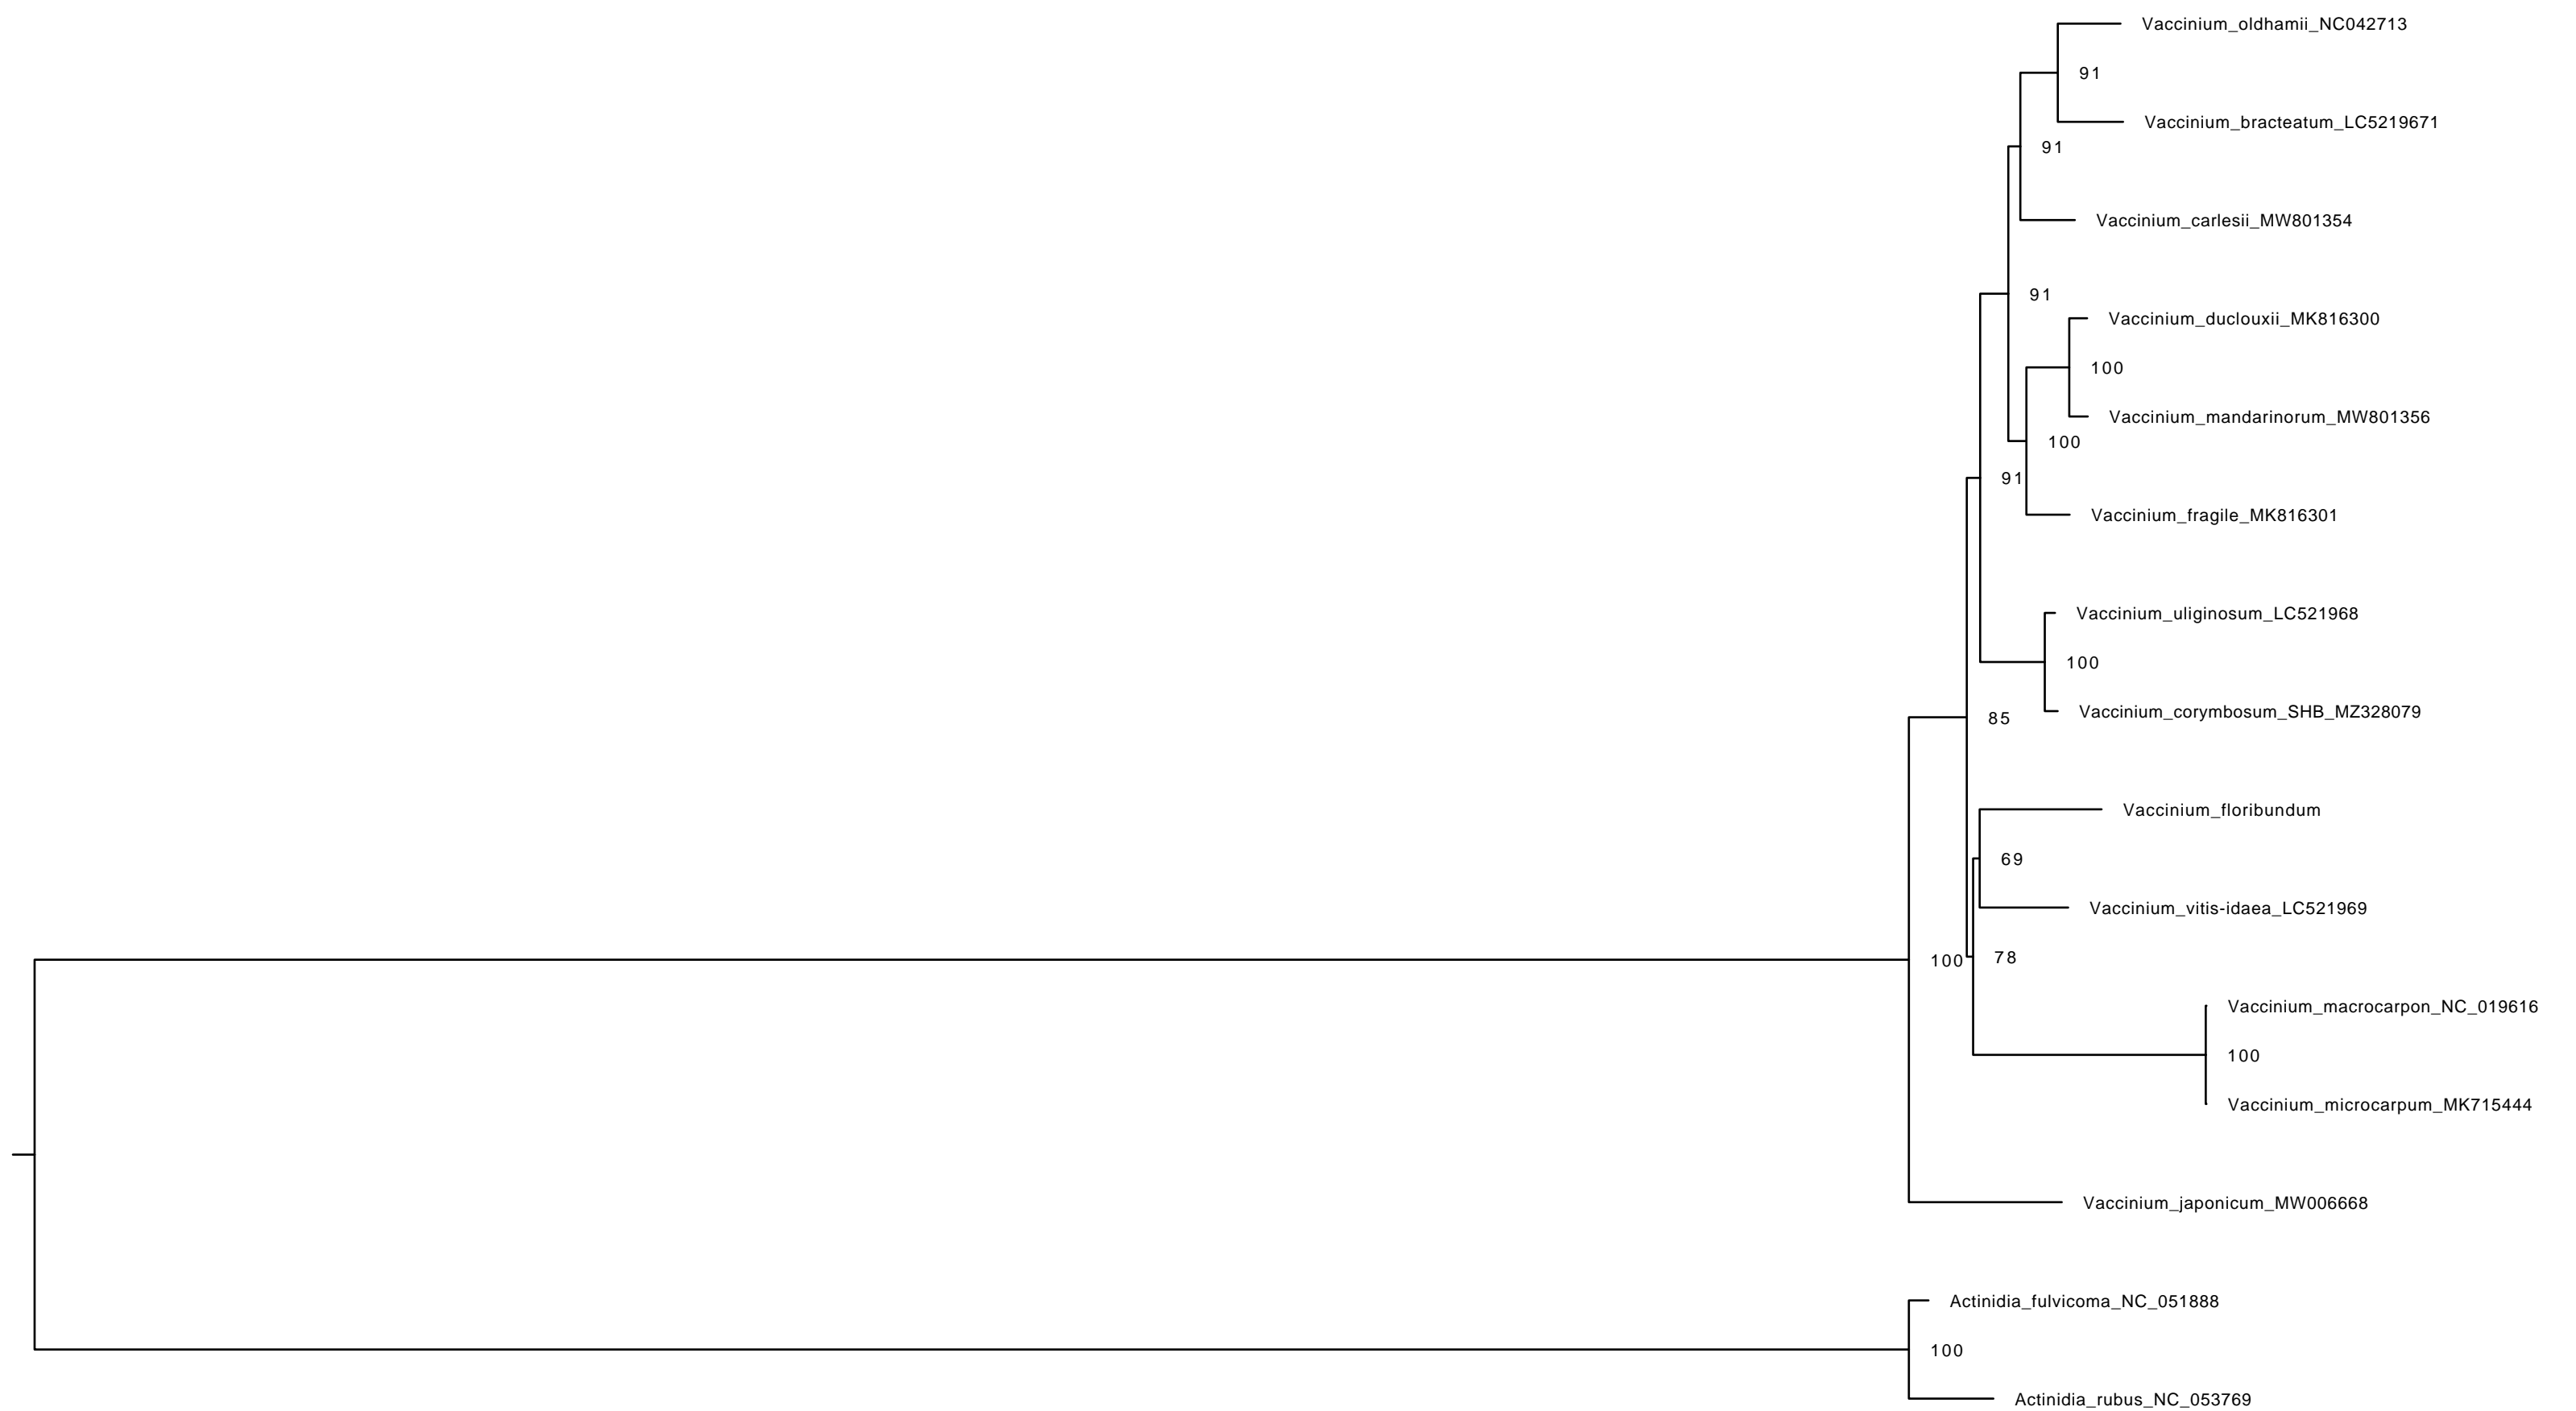

0.02

Supplement: s1 [file s1]

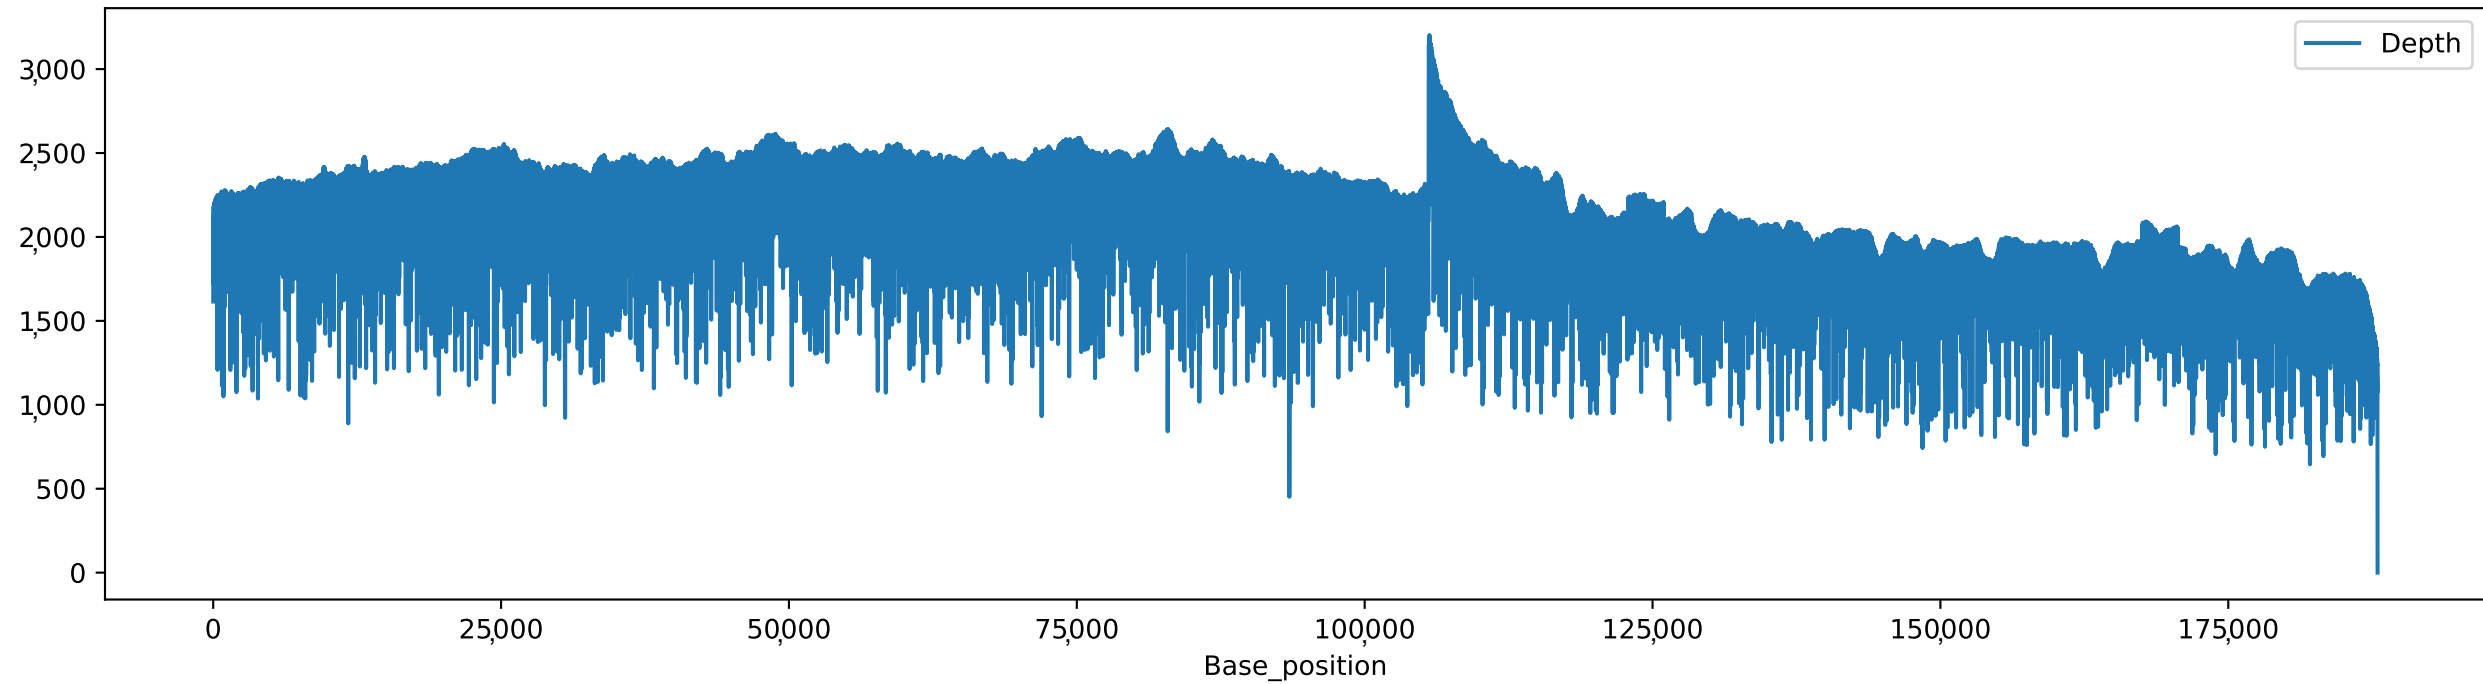

Supplement: s1 [file s1]

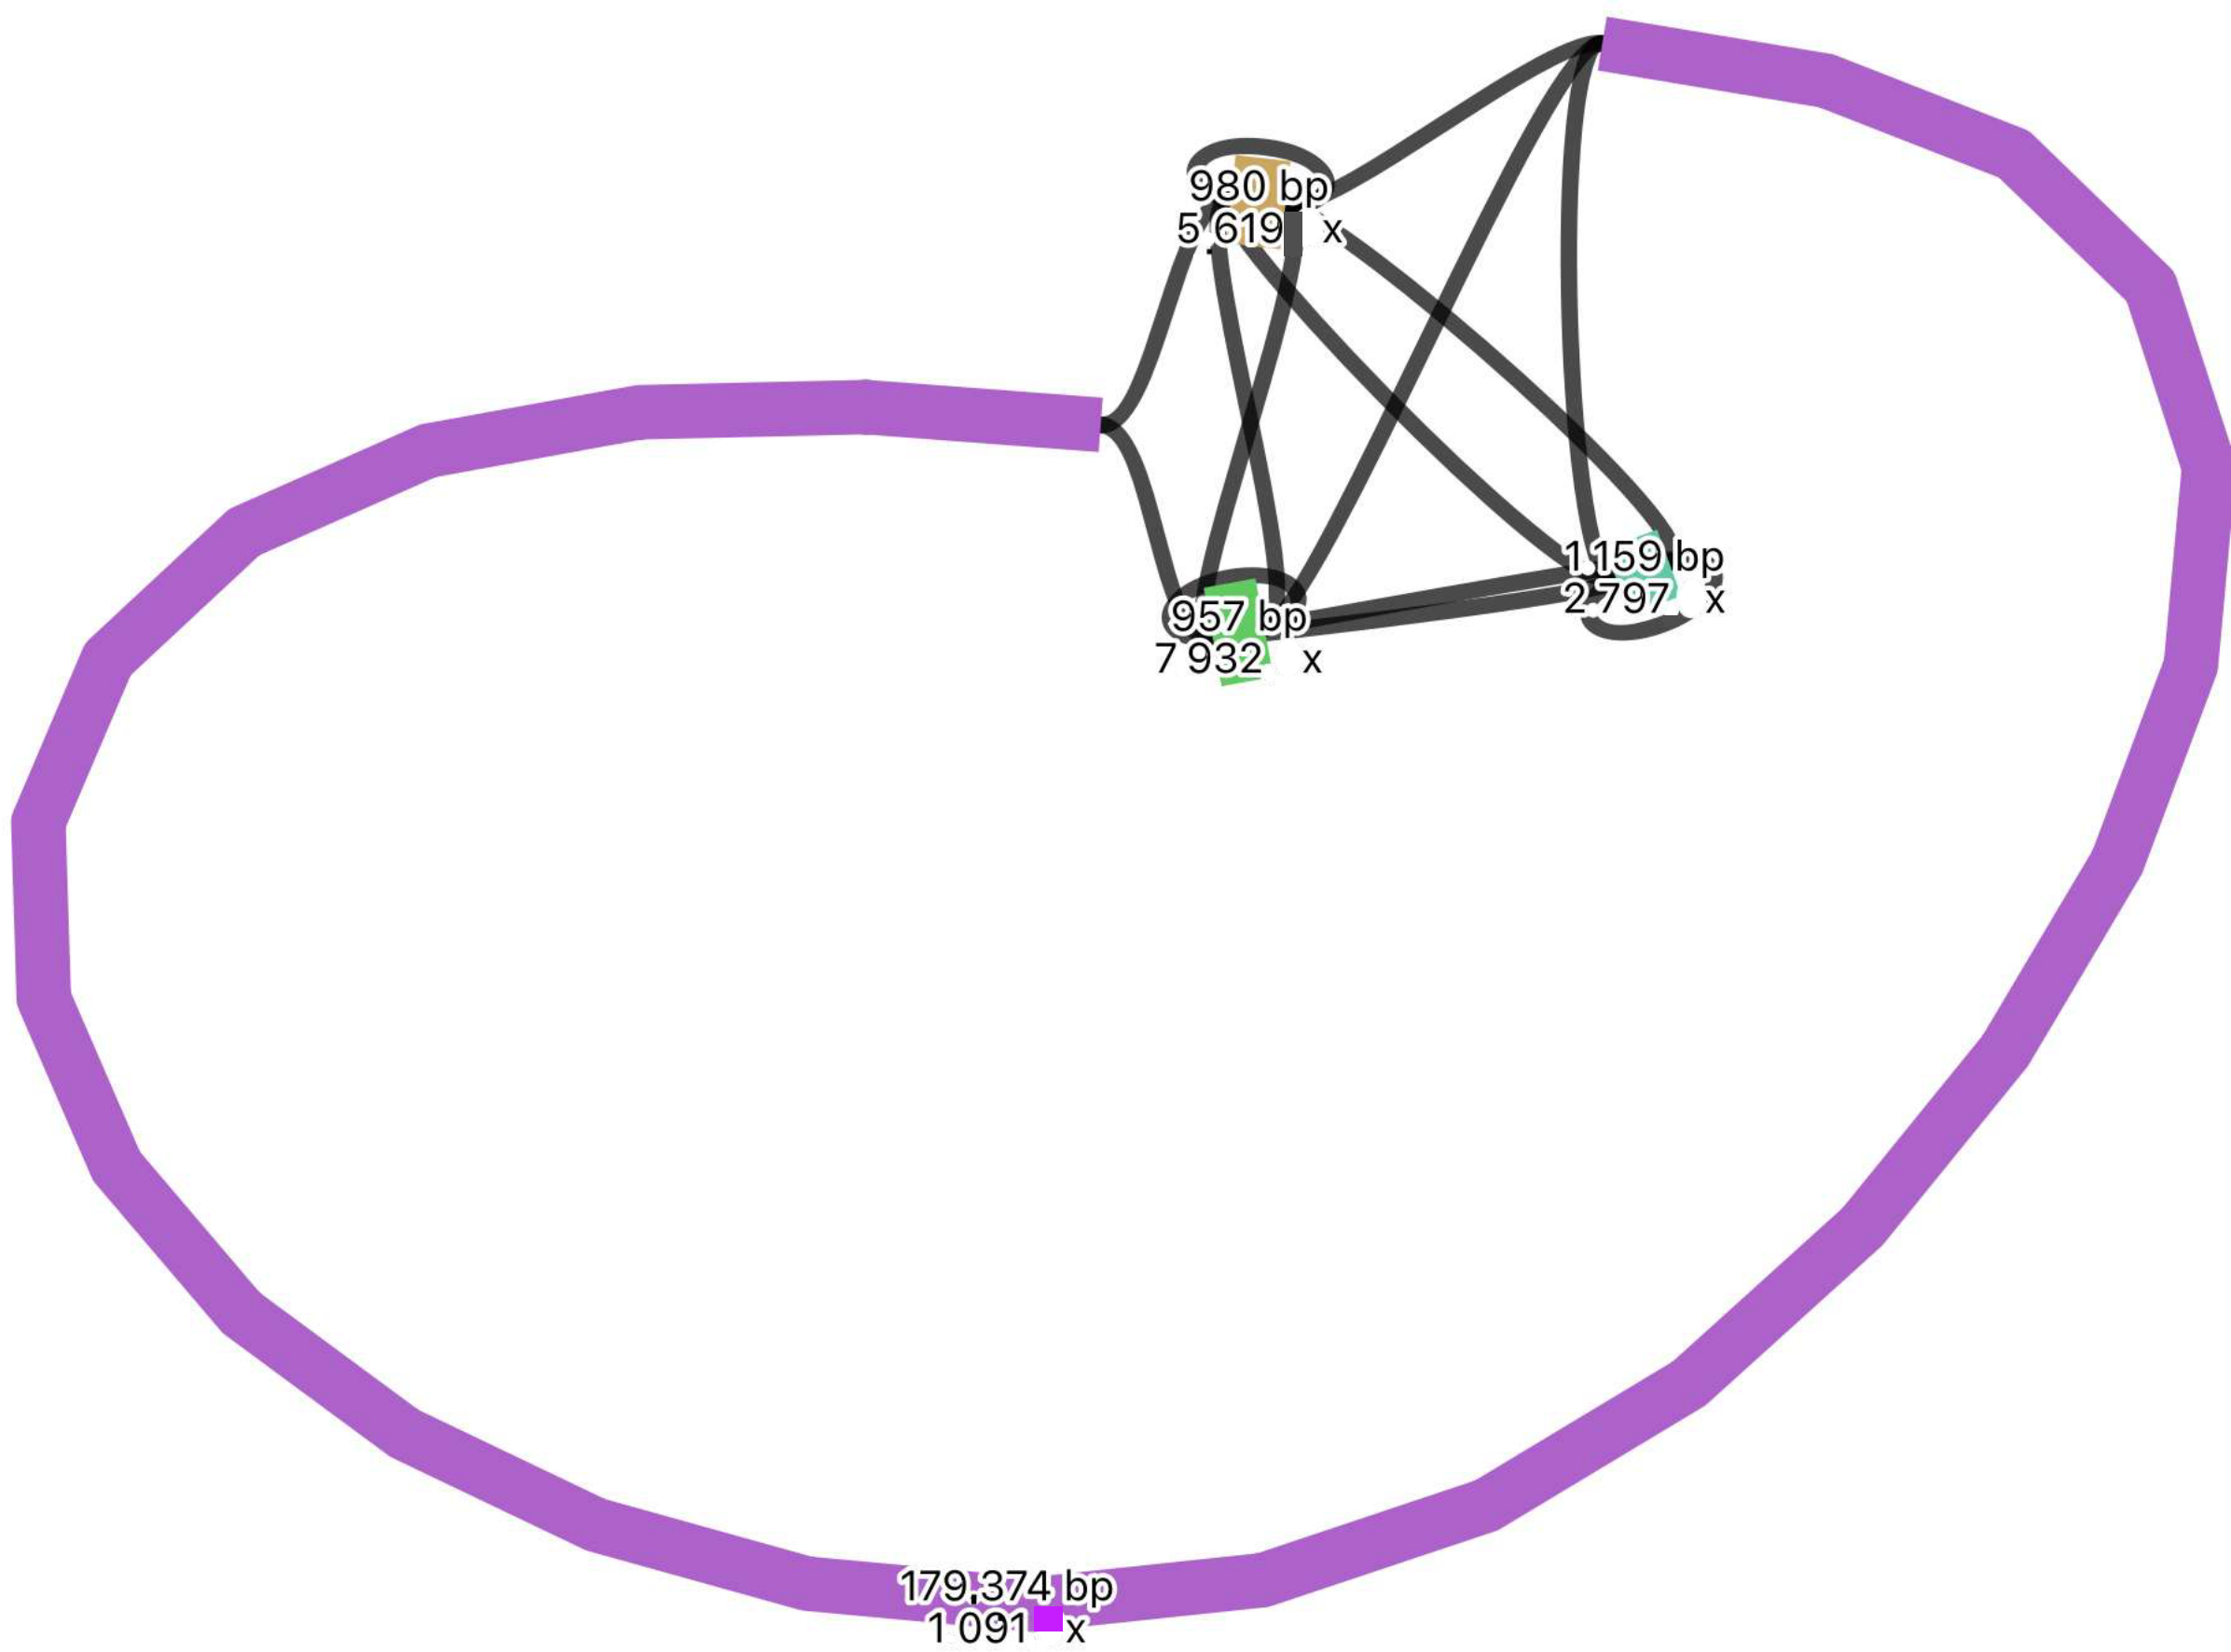

Supplement: s1 [file s1]

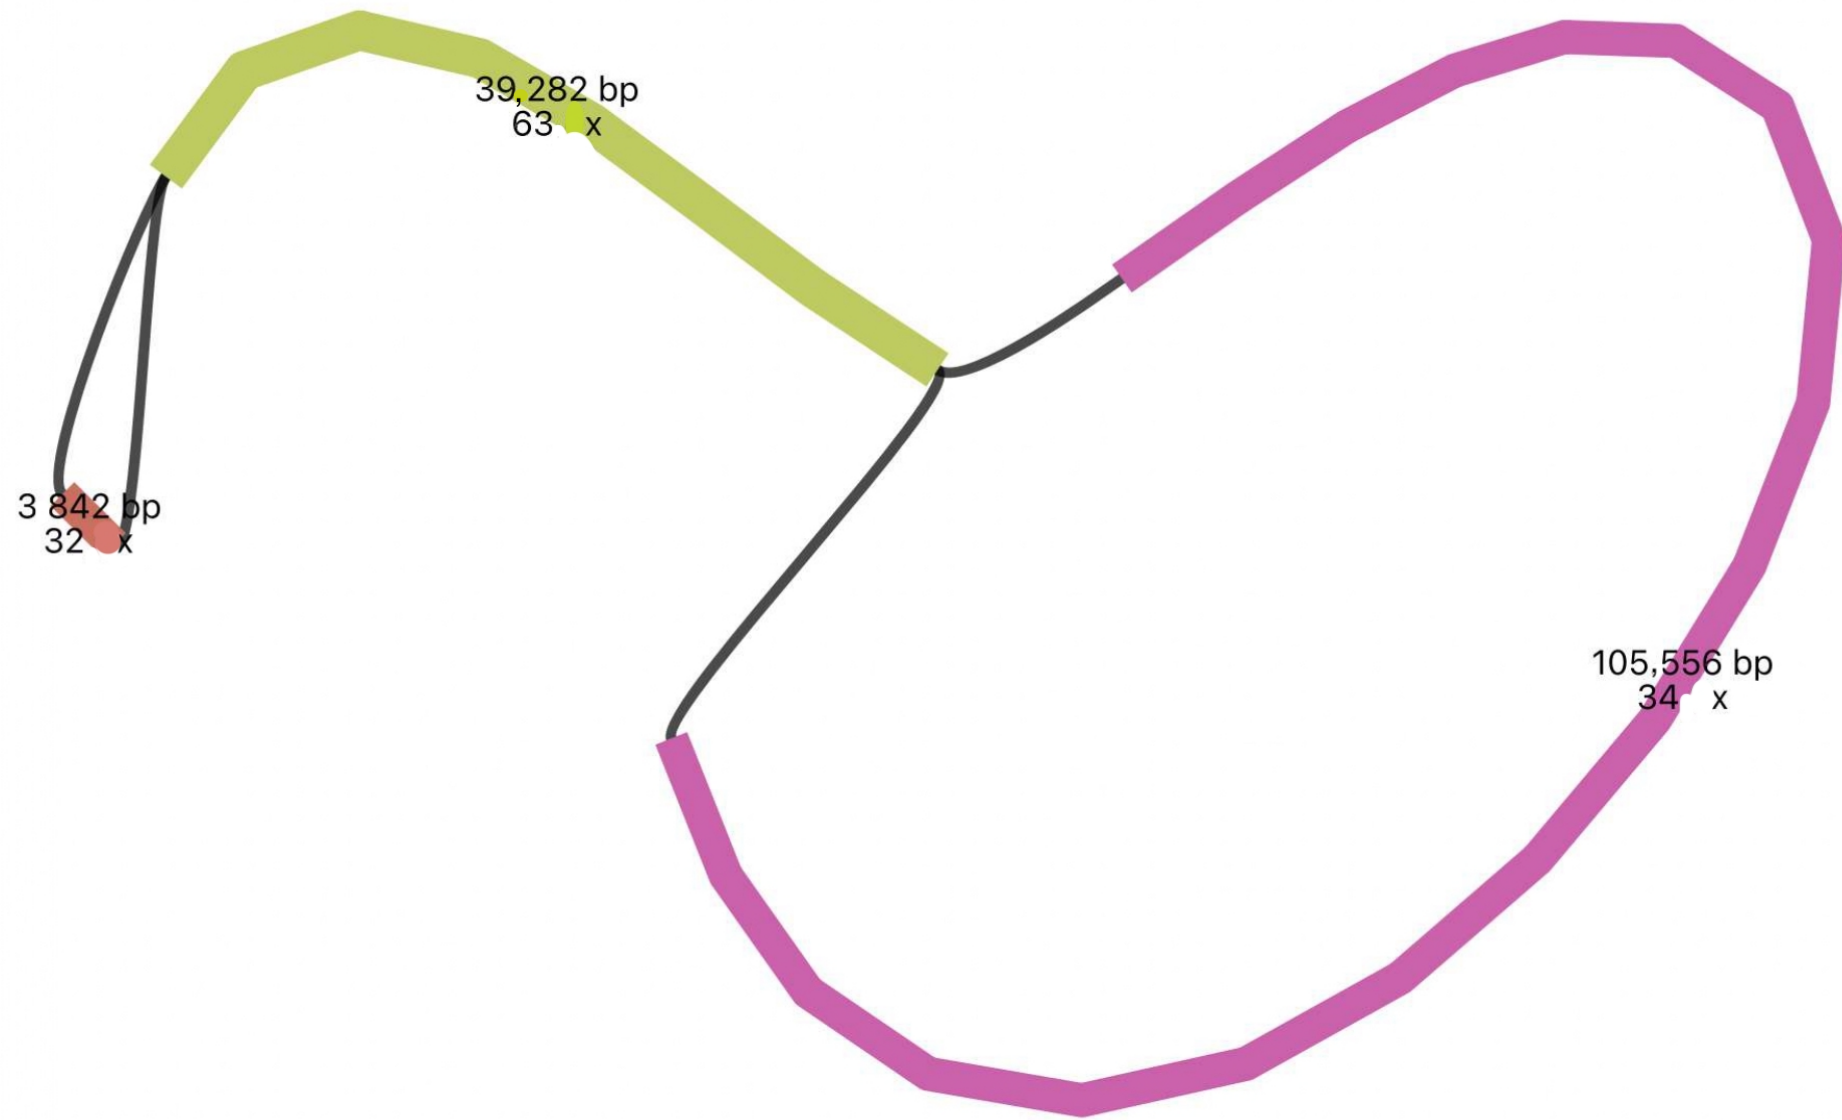

Supplement: s1 [file s1]
